# Supplementary material for: Nonradiative energy transfer in colloidal CdSe nanoplatelet films
Source: Royal Society of Chemistry journal article supplement (doi:10.1039/c4nr06003b), 2015-01-01
Supplement: c4nr06003b1.pdf [file c4nr06003b1.pdf]

## Supporting Information

# Nonradiative Energy Transfer in Colloidal CdSe Nanoplatelet Films

*Burak Guzelturk<sup>1,3</sup>, Murat Olutas<sup>1,2</sup>, Savas Delikanli<sup>1</sup>, Yusuf Kelestemur<sup>1</sup>, Onur Erdem<sup>1</sup> and  
Hilmi Volkan Demir<sup>1,3,\*</sup>*

<sup>1</sup> Department of Electrical and Electronics Engineering, Department of Physics, UNAM -  
Institute of Materials Science and Nanotechnology, Bilkent University, Ankara 06800 Turkey

<sup>2</sup> Department of Physics, Abant Izzet Baysal University, Bolu 14280, Turkey

<sup>3</sup> *Luminous!* Center of Excellence for Semiconductor Lighting and Displays, School of Electrical  
and Electronic Engineering, School of Physical and Mathematical Sciences, Nanyang  
Technological University, Nanyang Avenue, Singapore 639798, Singapore

\*Corresponding Author:

Email: volkan@bilkent.edu.tr, hvdemir@ntu.edu.sg

Phone.: +90 312 290-1021

Fax: +90 312 290-1123

**Table S1.** Fluorescence decay components of the donor 4 ML NPLs.

| TRF Decay Components         |               |               |               |               |                 |                 |                 |                 |
|------------------------------|---------------|---------------|---------------|---------------|-----------------|-----------------|-----------------|-----------------|
| Acceptor – Donor Ratio (A:D) | $\tau_1$ (ns) | $\tau_2$ (ns) | $\tau_3$ (ns) | $\tau_4$ (ns) | $A_1\tau_1$ (%) | $A_2\tau_2$ (%) | $A_3\tau_3$ (%) | $A_4\tau_4$ (%) |
| Only donor                   | 64.0          | 11.8          | 1.8           | 0.25          | 27.6            | 31.8            | 23.6            | 17.0            |
| 0.01                         | 63.0          | 10.9          | 1.7           | 0.22          | 27.9            | 30.9            | 23.2            | 18.0            |
| 0.06                         | 60.0          | 10.4          | 1.5           | 0.20          | 27.1            | 29.8            | 22.8            | 20.2            |
| 0.28                         | 59.1          | 10.5          | 1.6           | 0.22          | 22.5            | 28.2            | 25.3            | 24.0            |
| 0.56                         | 55.0          | 9.4           | 1.4           | 0.16          | 23.3            | 27.4            | 23.6            | 25.6            |
| 1.12                         | 53.0          | 8.8           | 1.2           | 0.14          | 21.5            | 27.3            | 25.5            | 25.7            |
| 1.69                         | 49.0          | 8.2           | 1.3           | 0.16          | 20.8            | 28.2            | 25.4            | 25.5            |

**Table S2.** Fluorescence decay components of the acceptor 5 ML NPLs.

| TRF Decay Components         |               |               |               |               |                 |                 |                 |                 |
|------------------------------|---------------|---------------|---------------|---------------|-----------------|-----------------|-----------------|-----------------|
| Acceptor – Donor Ratio (A:D) | $\tau_1$ (ns) | $\tau_2$ (ns) | $\tau_3$ (ns) | $\tau_4$ (ns) | $A_1\tau_1$ (%) | $A_2\tau_2$ (%) | $A_3\tau_3$ (%) | $A_4\tau_4$ (%) |
| Only acceptor                | 52.1          | 8.2           | 1.3           | 0.19          | 19.1            | 30.0            | 26.7            | 24.2            |
| 0.01                         | 87.0          | 16.6          | 4.5           | 0.75          | 19.7            | 34.6            | 35.1            | 10.6            |
| 0.06                         | 76.5          | 13.3          | 3.0           | 0.43          | 20.4            | 37.3            | 31.4            | 10.9            |
| 0.28                         | 67.4          | 11.5          | 2.6           | 0.42          | 19.0            | 36.2            | 32.0            | 12.8            |
| 0.56                         | 75.5          | 12.9          | 2.6           | 0.45          | 17.3            | 31.1            | 33.6            | 18.0            |
| 1.12                         | 77.9          | 12.5          | 2.3           | 0.36          | 20.6            | 29.8            | 30.5            | 19.0            |
| 1.69                         | 64.0          | 11.0          | 1.7           | 0.23          | 20.7            | 29.1            | 27.2            | 23.0            |

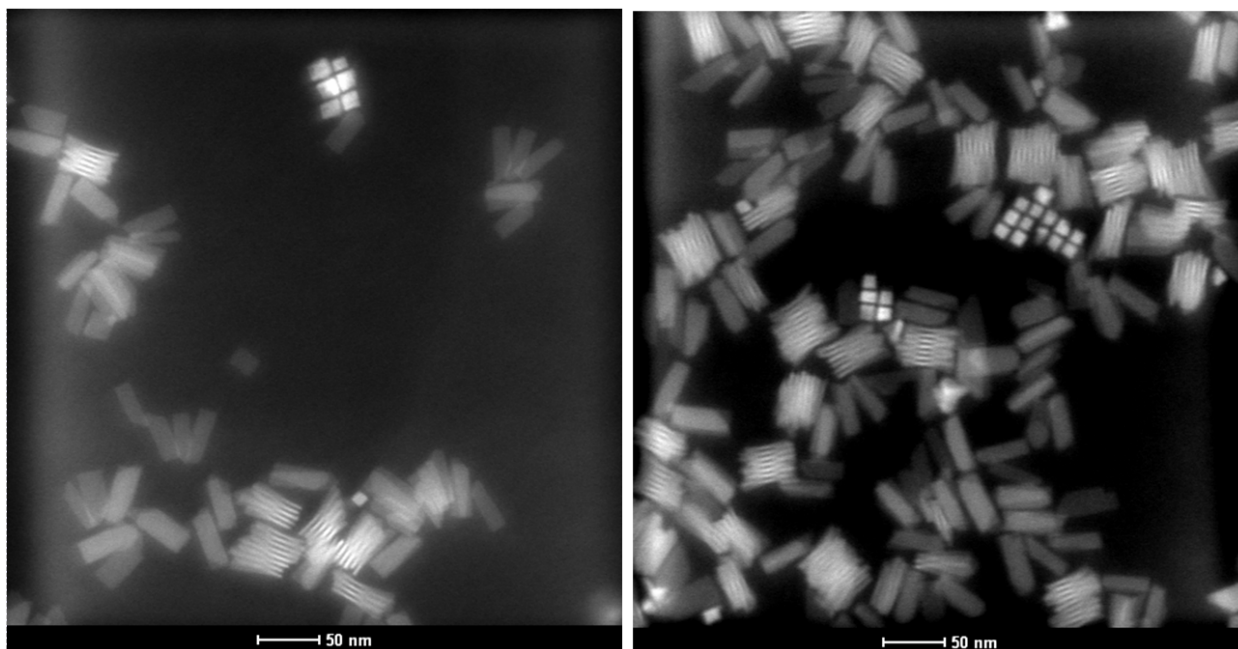

Figure S1. HAADF-TEM images of mixed NPL populations incorporating 2-3% 4 ML NPLs while the rest of the NPLs are 5 ML. 4 ML NPLs have the square-like shape with an average size of 10.81 nm ( $\pm$  0.53 nm) and 5 ML NPLs have the rectangle-like shape with an average size of 43.67 nm ( $\pm$  3.31 nm) and 12.94 nm ( $\pm$  1.51 nm).
